# Supplementary material
Source: PubMed Central journal article supplement (PMC2896781)
Supplement: mmc1.pdf [file mmc1.pdf]

## Supplemental Data

### Mosaic Uniparental Disomies and Aneuploidies

#### as Large Structural Variants of the Human Genome

Benjamín Rodríguez-Santiago, Nuria Malats, Nathaniel Rothman, Lluís Armengol, Montse Garcia-Closas, Manolis Kogevinas, Olaya Villa, Amy Hutchinson, Julie Earl, Gaele Marenne, Kevin Jacobs, Daniel Rico, Adonina Tardón, Alfredo Carrato, Gilles Thomas, Alfonso Valencia, Debra Silverman, Francisco X. Real, Stephen J. Chanock, and Luis A. Pérez-Jurado

**Figure S1.** Flow chart for CNV analysis with quality control and statistical filtering

**Figure S2.** Flow chart for genome-wide analysis to detect mosaic rearrangements (UPDs, CNVs and trisomies)

**Figure S3.** SNP array plots and experimental validation of mosaic rearrangements

**Table S1.** Mean and standard deviation (SD) of log R ratio (LogR), B-deviation (Bdev) and B-deviation of heterozygous SNPs (HetBdev) per autosomal chromosome of the 1,991 samples analysed.

**Table S2.** Mosaic rearrangements detected in cases and controls, divided by categories, including information on the validation methods used (microsatellites, MLPA and/or FISH), the chromosomal coordinates and size of the rearrangement, and the actual LogR and HetB-dev values obtained with the SNP array

**Table S2A.** Mosaic uniparental disomies detected showing normal LogR (copy number neutral) and abnormal heterozygous B-deviation parameters when compared to the genome-wide hybridization data of the sample and to the whole dataset

**Table S2B.** Mosaic copy number change rearrangements affecting autosomes

**Table S3.** Statistical tests for case-control comparisons of mosaic rearrangement frequency and proportion of cells carrying the rearrangement

**Table S4.** Genomic location and sequence characteristics of the breakpoint (BP) intervals for each somatic rearrangement

**Table S5.** Coordinates of MLPA and FISH probes and microsatellite PCR products (hg18 assembly)

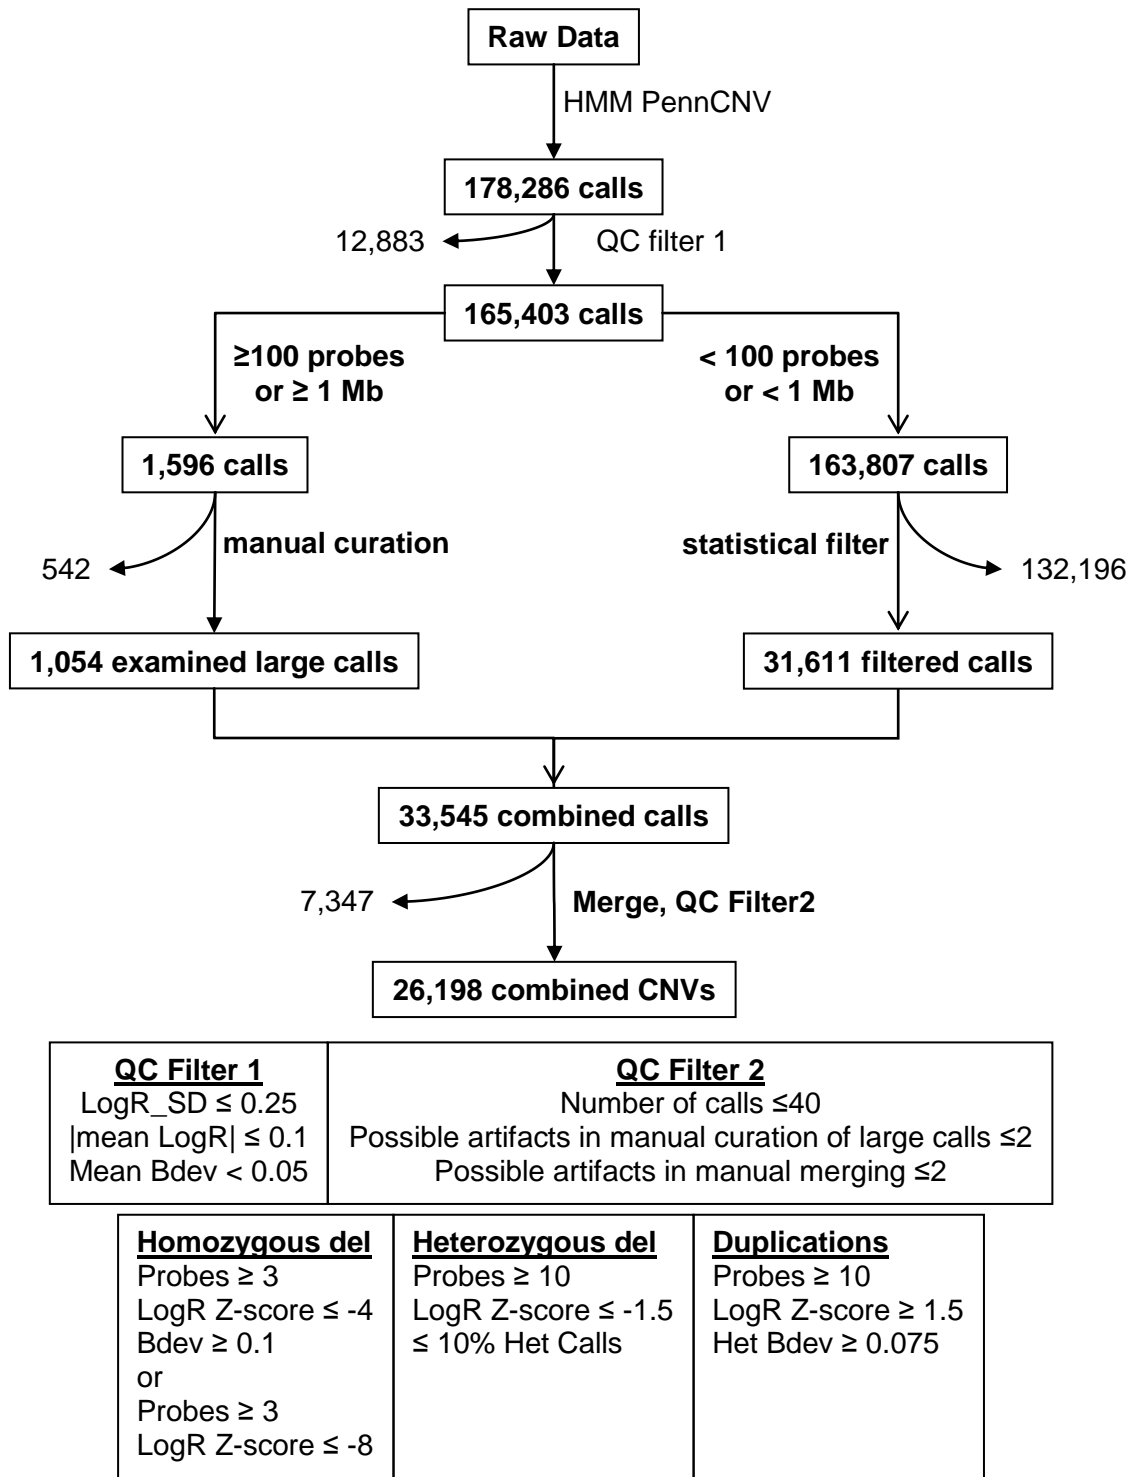

**Figure S1. Flow Chart for CNV Analysis with Quality Control and Statistical Filtering**

The number of calls discarded and remaining after each step is indicated. A detailed description of the CNV calling procedure has been described elsewhere (Itsara et al., *American Journal of Human Genetics* 84, 148-161, 2009) and may also be found in the methods section.

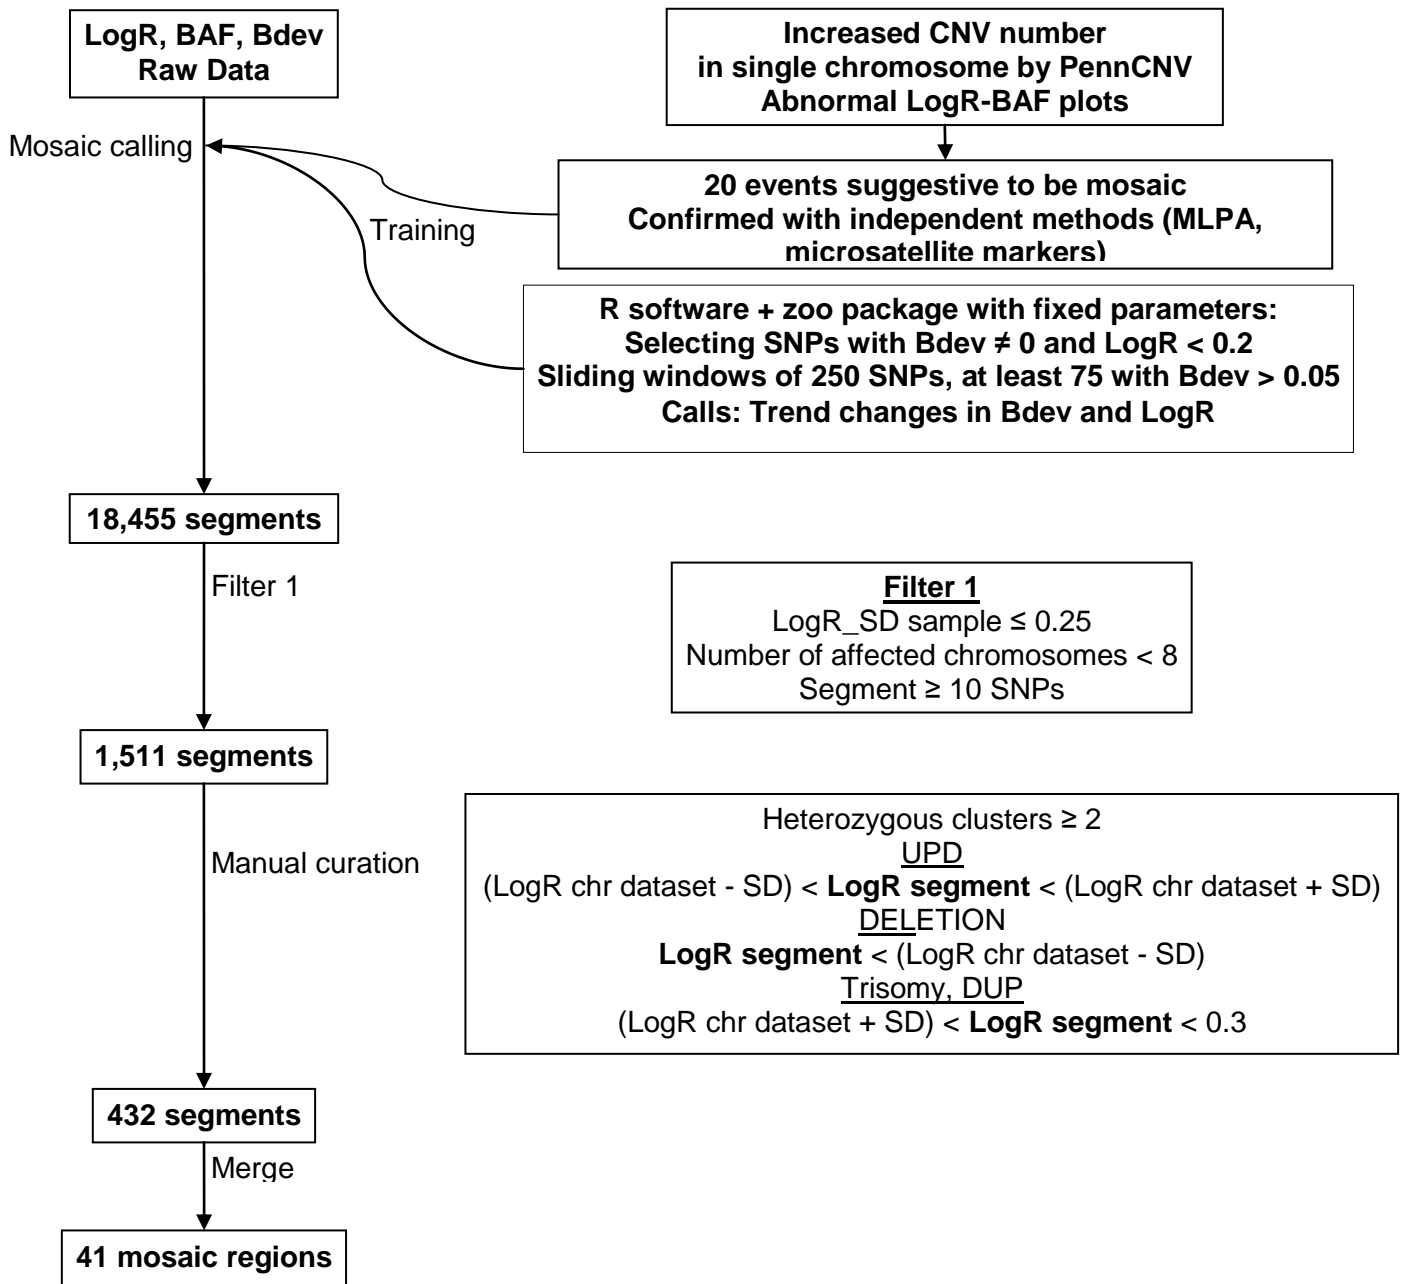

**Figure S2. Flow Chart for Genome-wide Analysis to Detect Mosaic Rearrangements (UPDs, CNVs, and Trisomies)**

After detecting 20 regions with an elevated number of CNVs in a single chromosome suspected of mosaic events, a specific bioinformatic tool was designed. A detailed description of the procedure may be found within the manuscript. This tool was first set up and trained with those 20 samples, obtaining a 95% detection rate without false positives in the remaining chromosomal regions. The method was then applied to the whole dataset, using filter 1 to discard low quality hybridizations. All segments were manually curated following the presented criteria. Finally, segments within 1 Mb were manually merged.

**Figure S3. SNP Array Plots and Experimental Validation of Mosaic Rearrangements**

The plot images show the LogR ratio (black dots, scale on the left side) and BAF (red dots, scale on the right side) values of each of the chromosomes identified carrying mosaic rearrangements. Samples' identifiers and chromosome numbers are shown on top of the plot. The corresponding independent experimental validation (when performed), comparing the sample to the wild-type (wt) pattern, is displayed at the side of each plot. The interpretations are summarized at the bottom of each page. Supplementary Table S6 shows the genome coordinates (hg18) for the microsatellite markers and MLPA probes used for validation of the different rearrangements.

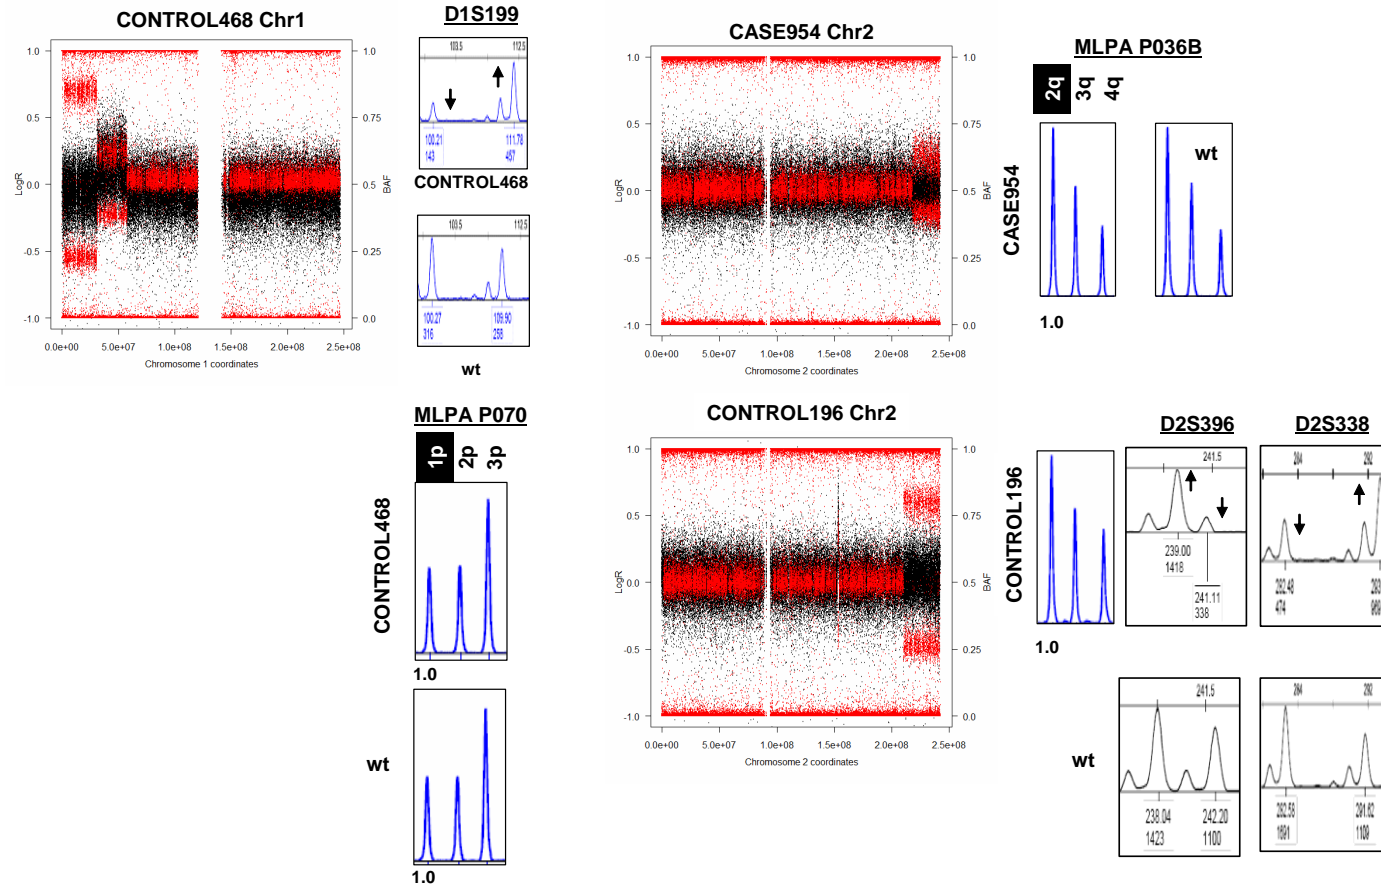

**Figure S3A. Mosaic UPDs**

CONTROL468: segmental 1p UPD; CASE954 and CONTROL196 segmental 2q UPD. MLPA confirmed the disomic state at the UPD loci with no gain or loss of genetic material (~1.0 RPH). Microsatellite analysis ratified the allelic imbalance in blood DNA reflected by an aberrant ratio between allelic peaks (arrows) with respect to the wild type pattern.

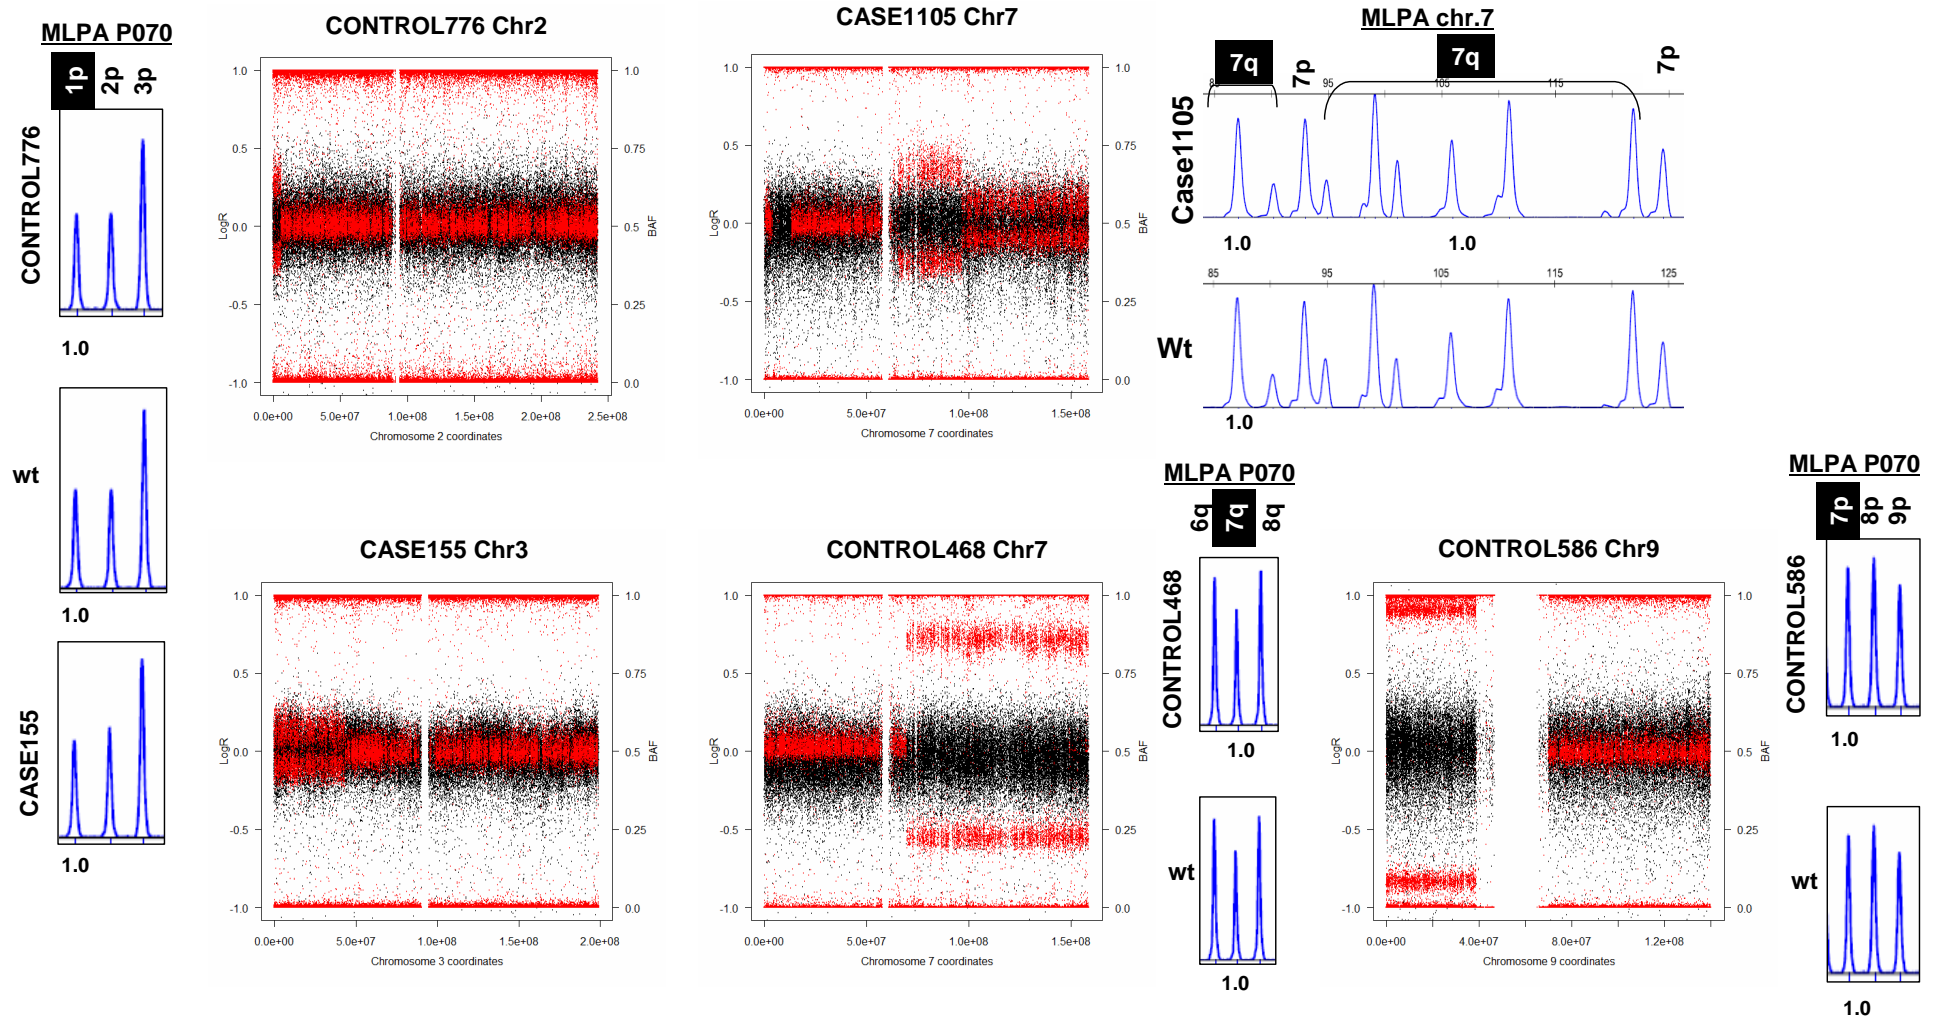

**Figure S3B. Mosaic UPDs**

Mosaic segmental UPDs at chromosomes 2p in CONTROL776, 7q in CASE1105 and CONTROL468, 3p in CASE155, and 9p in CONTROL586. MLPA with specific regional probes revealed values consistent with a disomic state at the UPD loci, showing no gain or loss of genetic material ( $\sim 1.0$  RPH) in all cases.

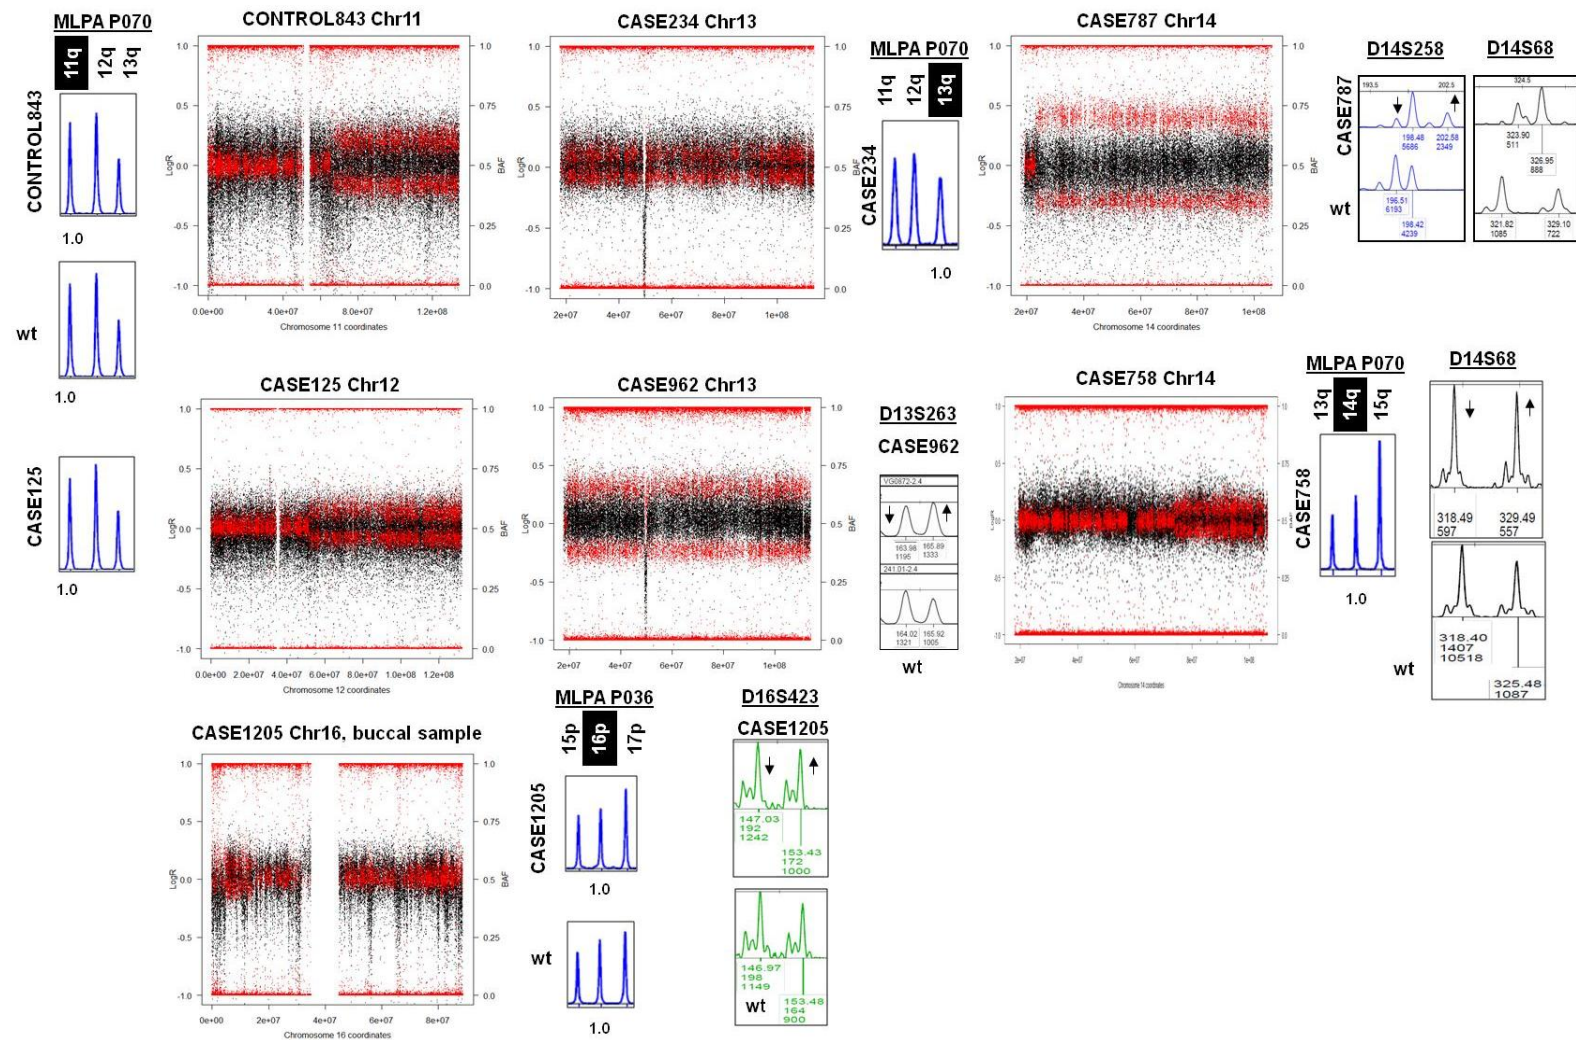

**Figure S3C. Mosaic UPDs**

Mosaic UPDs at 11q in CONTROL843, 12q in CASE125, 13q in CASE234 and CASE962, 14q in CASE787 and CASE758, and 16p in CASE1205. MLPA confirmed the disomic state at the UPD loci with no gain or loss of genetic material (~1.0 RPH) and microsatellite analysis in CASE962 ratified the allelic imbalance in blood DNA reflected by an aberrant ratio between allelic peaks with respect to the wild type pattern.

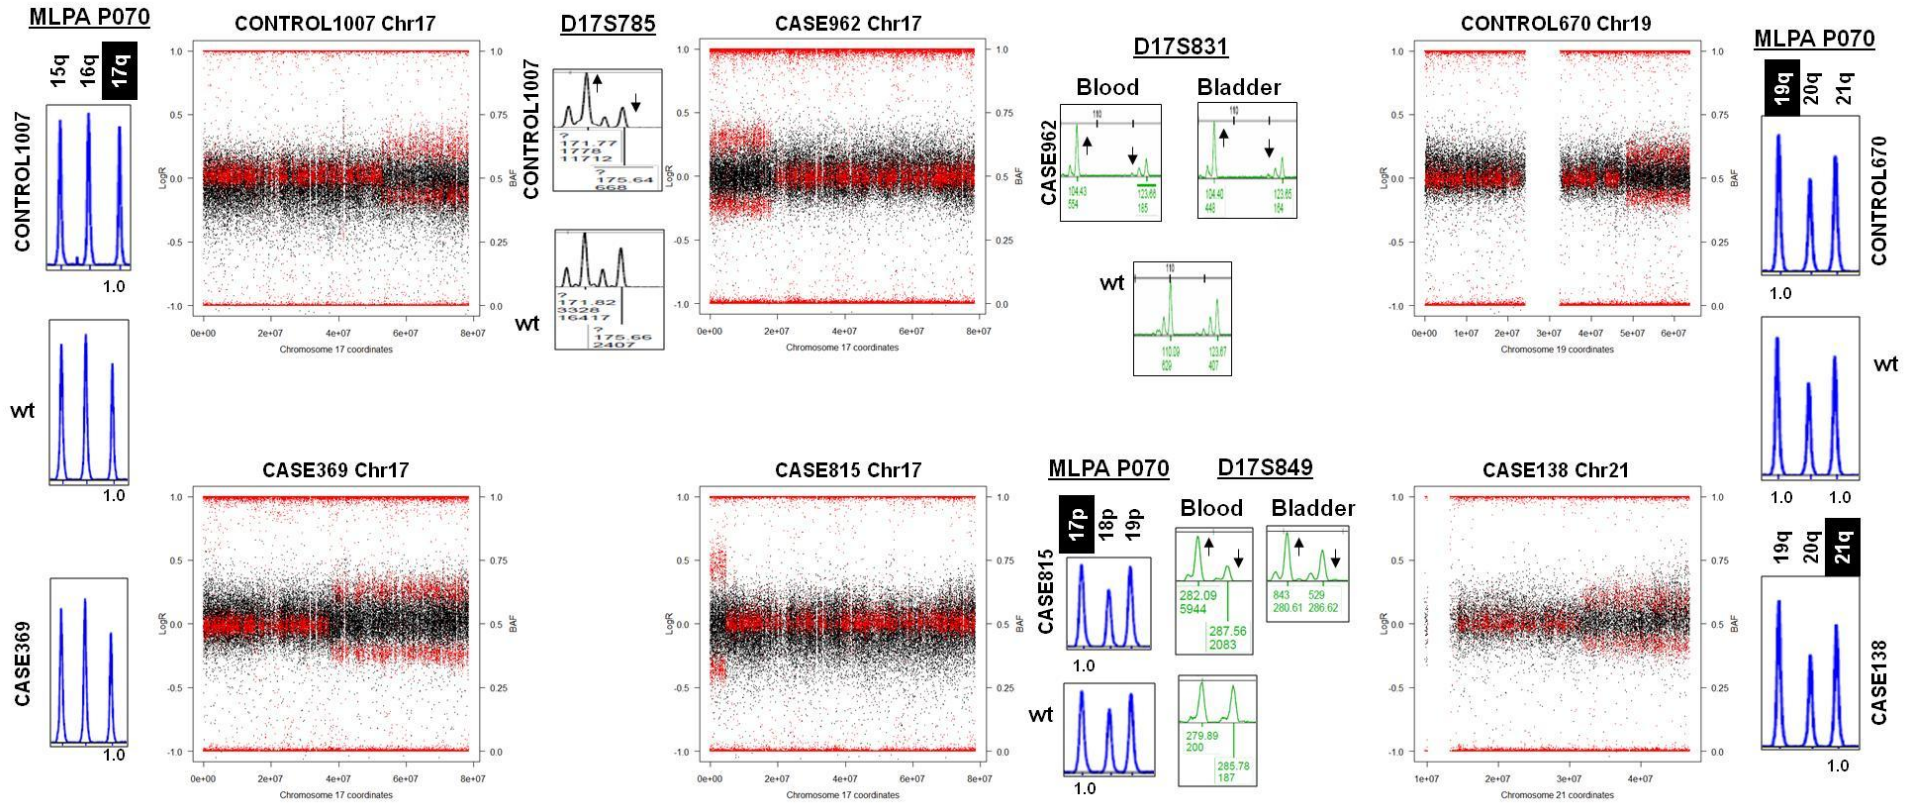

**Figure S3D. Mosaic UPDs**

Mosaic UPDs at 17q in CONTROL1007 and CONTROL369, 17p in CASE962 and CASE815, 19q in CONTROL670, and 21q in CASE138. MLPA confirmed the disomic state at the UPD loci with no gain or loss of genetic material (~1.0 RPH), while microsatellite analysis ratified the allelic imbalance reflected by an aberrant ratio between allelic peaks with respect to the wild-type pattern in CONTROL1007 and in two different tissues (blood and bladder) of two individuals shown (CASE962 and CASE815).



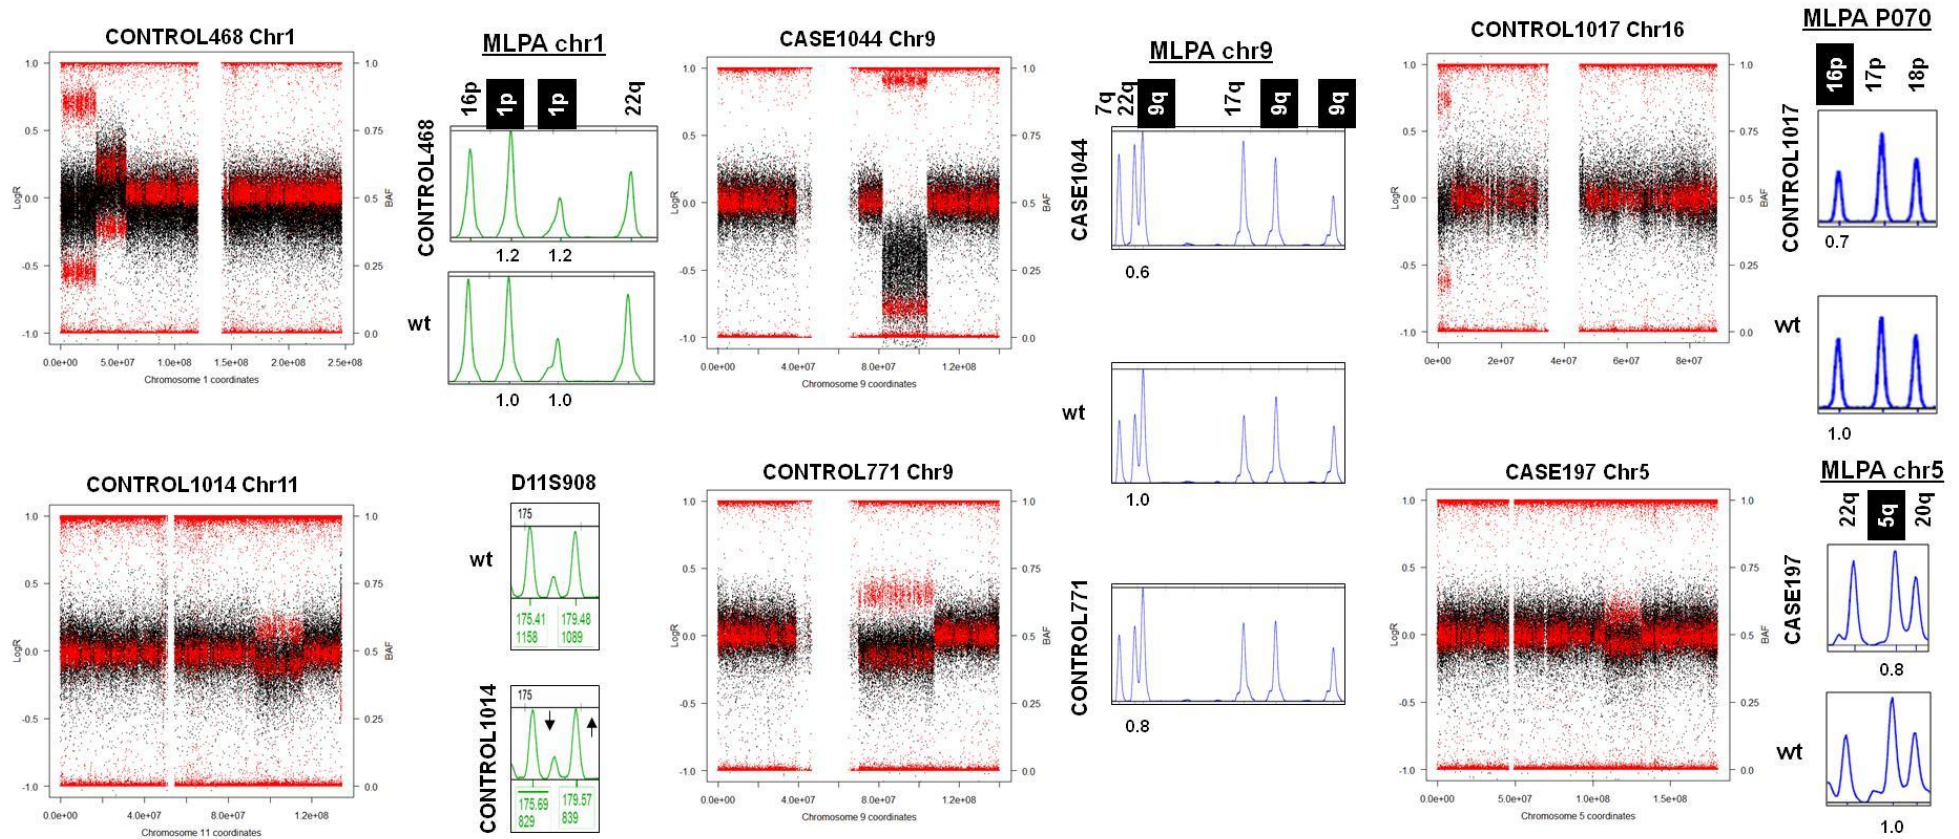

**Figure S3E. Mosaic CNVs**

Mosaic CNV rearrangements detected in CONTROL468 (1p duplication), CASE1044 and CONTROL771 (9q deletions), CONTROL1014 (11q deletion), CONTROL1017 (16p deletion) and CASE197 (5q deletion). MLPA confirmed a loss of genetic material (RPH < 0.8) consistent with a mosaic regional deletion in the three individuals shown with respect to the wild-type sample. Microsatellite analysis ratified an allelic imbalance in sample CONTROL1014.

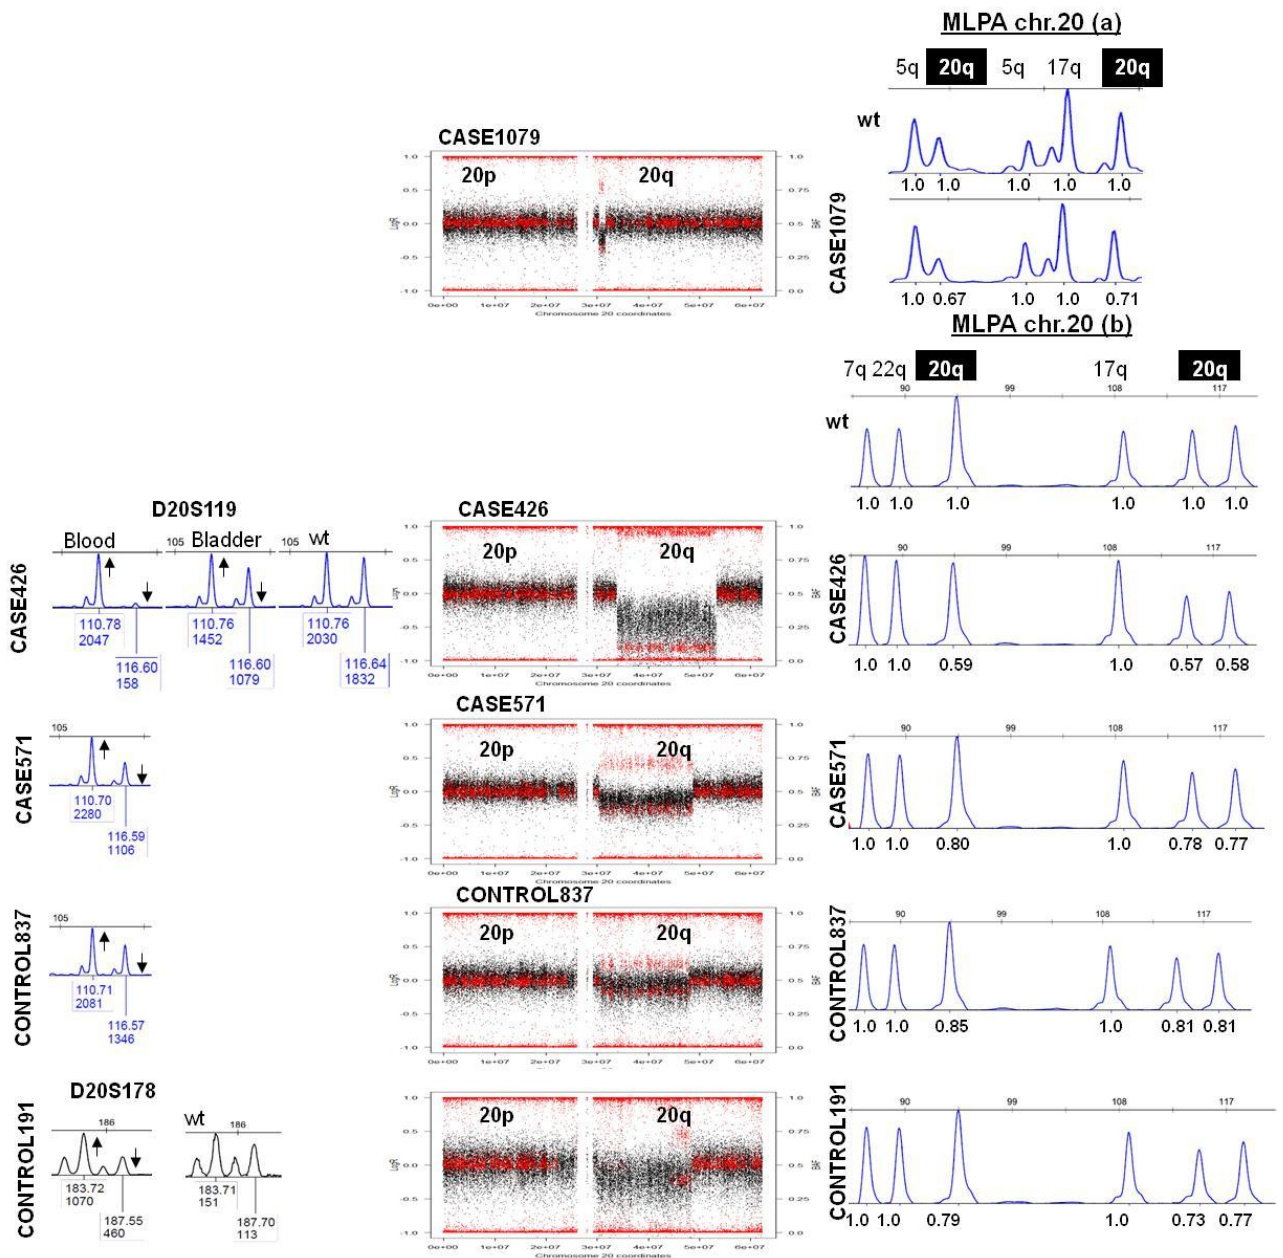

**Figure S3F. Mosaic chr20 CNVs**

A loss of genetic material from chromosome 20q is revealed by MLPA (RPHs between 0.57 and 0.85) in all 5 detected samples. Microsatellite analysis in blood (4 individuals) and bladder (CASE426) ratified an allelic imbalance with respect to the wild-type pattern.

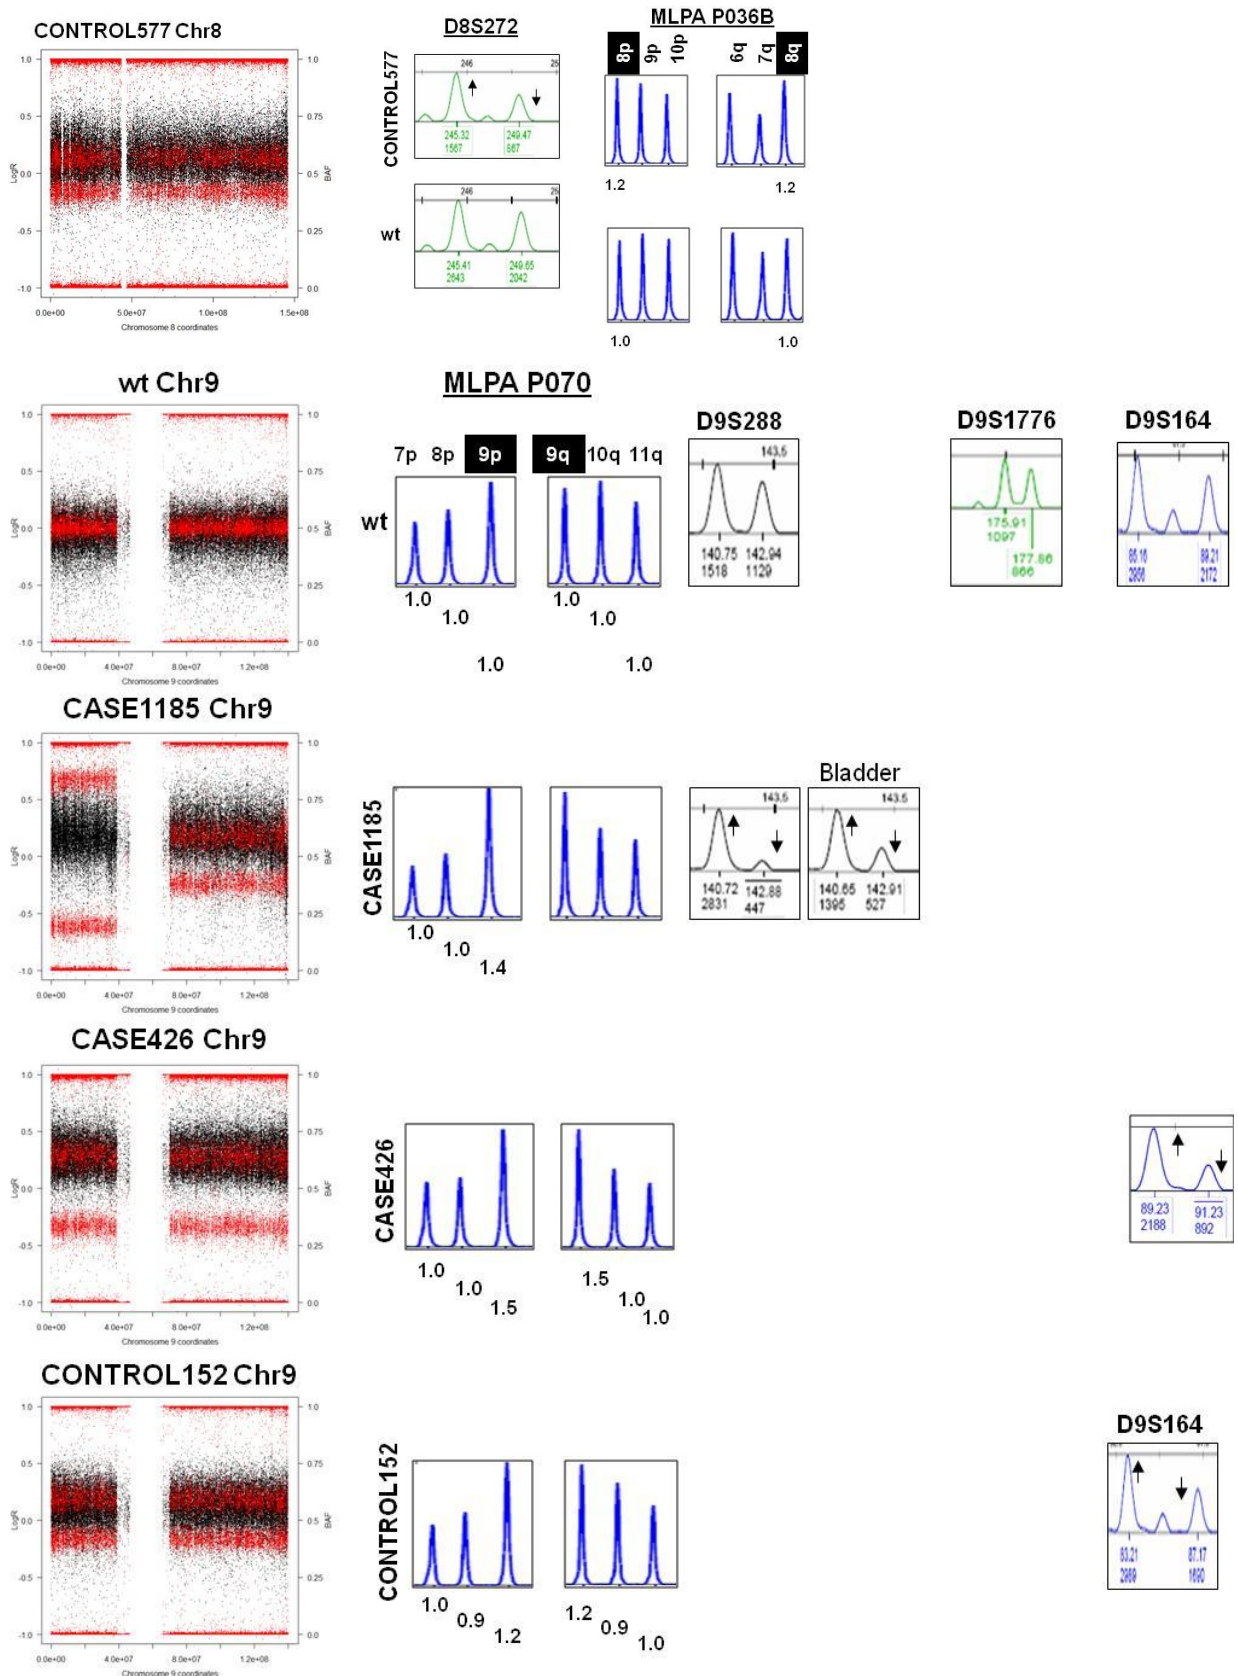

**Figure S3G. Mosaic Trisomies**

Mosaic trisomies (polysomies?). MLPA confirmed a gain of genetic material at the trisomic loci (RPH > 1.2) while microsatellite analysis ratified the allelic imbalance without detecting third alleles.

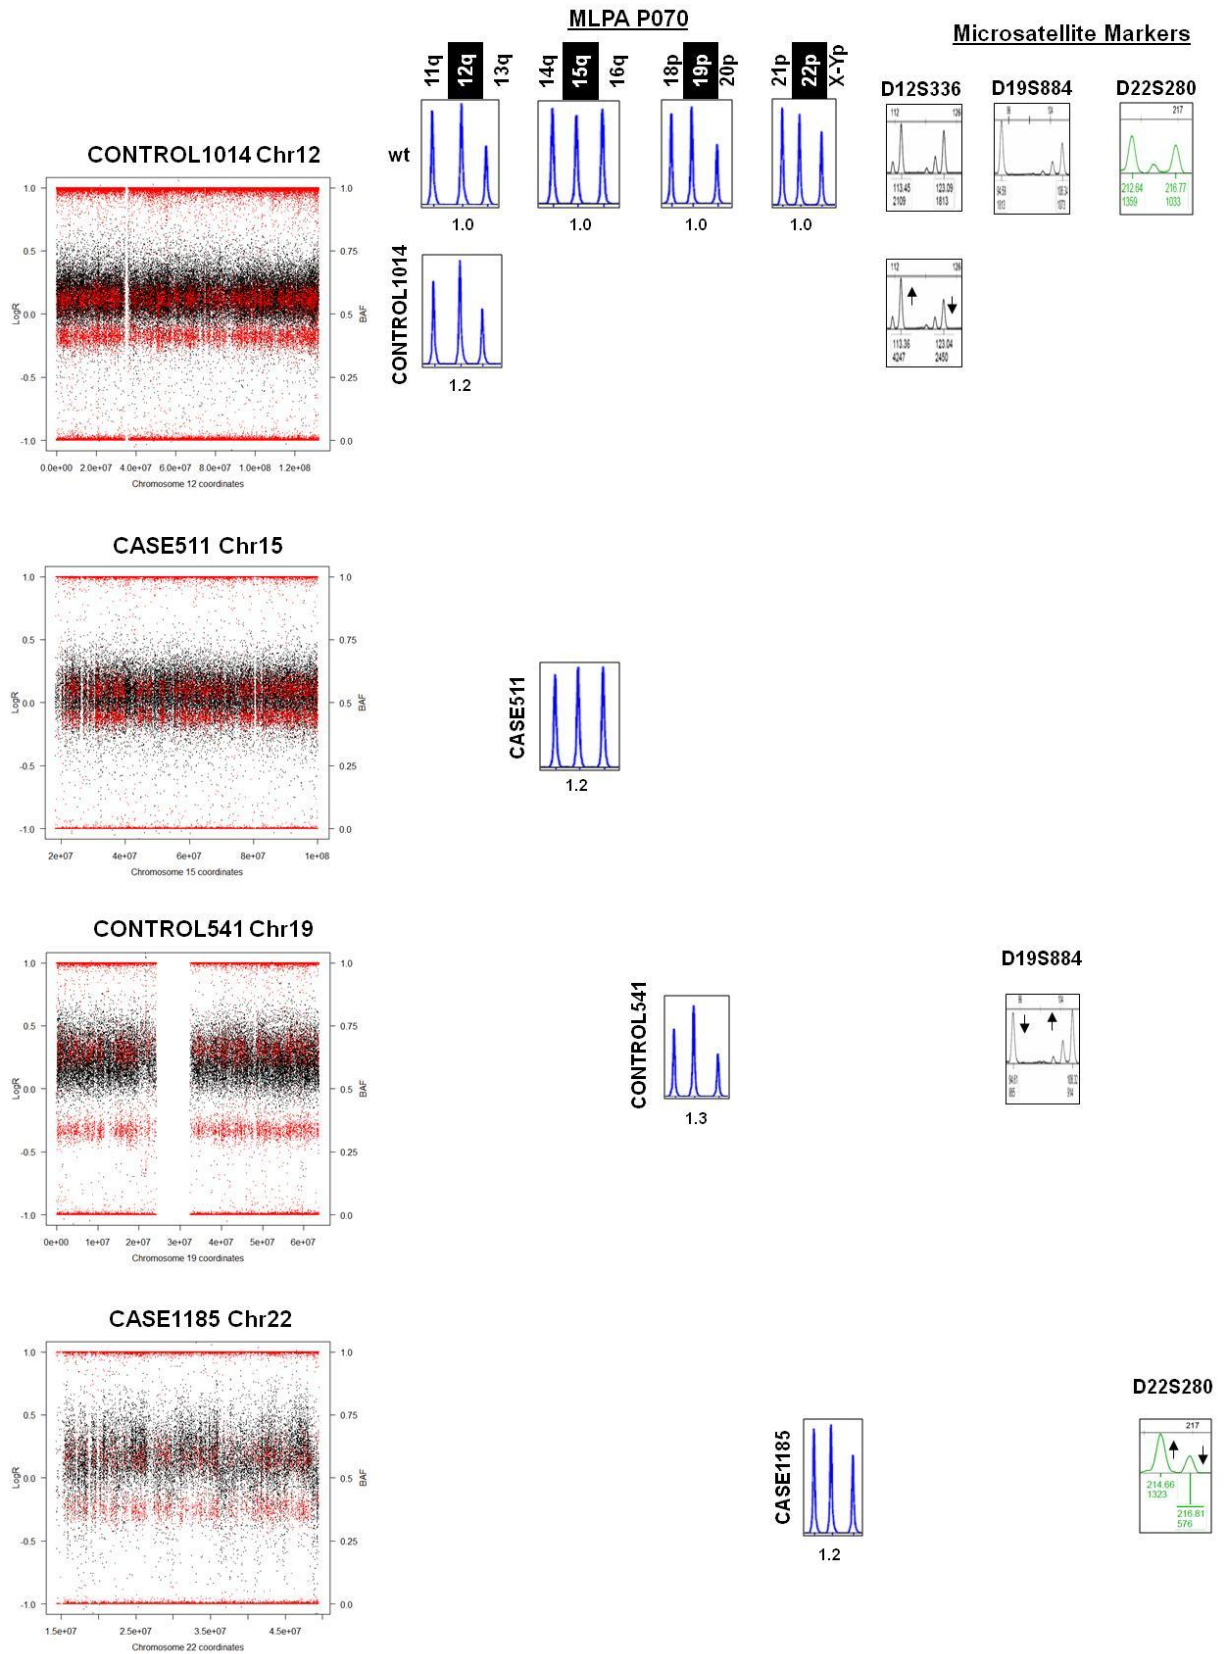

**Figure S3H. Mosaic Trisomies**

**Table S1.**

| <b>Chr</b> | <b>LogR</b>      | <b>Bdev</b>     | <b>HetBdev</b>  |
|------------|------------------|-----------------|-----------------|
| 1          | -0.0185 ± 0.0369 | 0.0125 ± 0.0099 | 0.0344 ± 0.0124 |
| 2          | -0.021 ± 0.0389  | 0.0125 ± 0.0099 | 0.0333 ± 0.0123 |
| 3          | -0.0208 ± 0.0398 | 0.0125 ± 0.0099 | 0.0331 ± 0.0123 |
| 4          | -0.025 ± 0.0446  | 0.0127 ± 0.0099 | 0.0336 ± 0.0123 |
| 5          | -0.0219 ± 0.0402 | 0.0125 ± 0.0099 | 0.0332 ± 0.0123 |
| 6          | -0.0228 ± 0.039  | 0.0131 ± 0.0099 | 0.035 ± 0.0122  |
| 7          | -0.0214 ± 0.0391 | 0.0133 ± 0.0099 | 0.0355 ± 0.0126 |
| 8          | -0.0207 ± 0.0394 | 0.0124 ± 0.0099 | 0.0328 ± 0.0123 |
| 9          | -0.02 ± 0.0387   | 0.0127 ± 0.01   | 0.0336 ± 0.0131 |
| 10         | -0.0185 ± 0.0372 | 0.0125 ± 0.0099 | 0.0335 ± 0.0122 |
| 11         | -0.0209 ± 0.0372 | 0.0128 ± 0.0099 | 0.0344 ± 0.0123 |
| 12         | -0.0195 ± 0.0376 | 0.0125 ± 0.0099 | 0.0339 ± 0.0124 |
| 13         | -0.0228 ± 0.0425 | 0.0124 ± 0.01   | 0.0325 ± 0.0125 |
| 14         | -0.0212 ± 0.038  | 0.0125 ± 0.0099 | 0.0334 ± 0.0126 |
| 15         | -0.0181 ± 0.037  | 0.0127 ± 0.0098 | 0.0345 ± 0.0123 |
| 16         | -0.0192 ± 0.0398 | 0.0132 ± 0.0099 | 0.0363 ± 0.0124 |
| 17         | -0.0179 ± 0.0404 | 0.0134 ± 0.0099 | 0.037 ± 0.0125  |
| 18         | -0.0204 ± 0.0397 | 0.0122 ± 0.0099 | 0.0321 ± 0.0123 |
| 19         | -0.0215 ± 0.051  | 0.0152 ± 0.0102 | 0.0427 ± 0.0139 |
| 20         | -0.0181 ± 0.0387 | 0.0123 ± 0.01   | 0.0331 ± 0.0125 |
| 21         | -0.0216 ± 0.0394 | 0.0133 ± 0.0099 | 0.0342 ± 0.0122 |
| 22         | -0.0197 ± 0.0475 | 0.0136 ± 0.01   | 0.0368 ± 0.0127 |

Mean and standard deviation (SD) of log R ratio (LogR), B-deviation (Bdev) and B-deviation of heterozygous SNPs (HetBdev) per autosomal chromosome of the 1,991 samples analysed. Data are presented as mean ± SD.

**Table S2. Mosaic rearrangements** detected in cases and controls, divided by categories with information about the validation methods used (microsatellites, MLPA and/or FISH), chromosomal coordinates and size of the rearrangement, and actual LogR and Heterozygous B-deviation values obtained with the SNP array.

**Microarray Values shown per sample (columns 10-17):** **LogR sample:** Mean LogR from all autosomal probes of the array (chr1-22) in the sample; **LogR mosaic:** Mean LogR from all probes within the rearranged region; **LogR chr dataset:** Mean LogR from all probes of the chromosome analysed in the whole dataset; **LogR SD chr dataset:** Standard Deviation (SD) from mean LogR of whole dataset; **HetBdev sample:** Mean B-deviation from autosomal heterozygote probes (chr1-22) of the mosaic sample; **HetBdev mosaic:** Mean B-deviation from heterozygote probes within the mosaic region; **HetBdev chr dataset:** Mean B-deviation of heterozygote probes from the chromosome analysed in whole dataset; **HetBdev SD chr dataset:** SD from mean B-deviation of heterozygote probes from the chromosome analysed in whole dataset.

**Concordance/Confirmation** of the rearrangements by independent experimental methods (**columns 3-5**): Microsatellite markers (**Micros.**), Multiplex Ligation Probe-dependent Amplification (**MLPA**) and/or fluorescence In Situ Hybridisation (**FISH**). FISH experiments were performed in bladder tissue. MLPA probemixes used included the commercial subtelomeric panels P70 and P36B (MRC-Holland) and custom made chr7 (19 probes); chr17 (1 probe), chr20 (3 probes) and chr22 (11 probes) panels.

**Table S2A.** Mosaic **uniparental disomies** detected showing normal LogR (copy number neutral) and abnormal heterozygous B-deviation parameters when compared to the genome-wide hybridization data of the sample and to the whole dataset.

| sampleID    | rearrangement | Micros. | MLPA | FISH | Chr | start       | end         | Size (Mb) | LogR sample | LogR mosaic | LogR chr_dataset | LogR_SD chr_dataset | HetBdev sample | HetBdev mosaic | HetBdev chr_dataset | HetBdev_SD chr_dataset |
|-------------|---------------|---------|------|------|-----|-------------|-------------|-----------|-------------|-------------|------------------|---------------------|----------------|----------------|---------------------|------------------------|
| CONTROL468  | UPD           | YES     | YES  |      | 1   | 1           | 31,505,375  | 31.5      | -0.067      | -0.063      | -0.019           | 0.037               | 0.044          | 0.3            | 0.034               | 0.012                  |
| CONTROL776  | UPD           | NA      | YES  |      | 2   | 1           | 5,974,108   | 5.9       | 0.003       | -0.014      | -0.021           | 0.039               | 0.041          | 0.127          | 0.033               | 0.012                  |
| CONTROL196  | UPD           | YES     | YES  |      | 2   | 210,669,755 | 242,951,149 | 32.2      | -0.001      | 0.013       | -0.021           | 0.039               | 0.042          | 0.259          | 0.033               | 0.012                  |
| CASE954     | UPD           | NI      | YES  |      | 2   | 218,476,667 | 242,951,149 | 24.4      | -0.004      | 0.001       | -0.021           | 0.039               | 0.034          | 0.106          | 0.033               | 0.012                  |
| CASE155     | UPD           | NA      | YES  |      | 3   | 1           | 43,770,009  | 43.3      | -0.017      | -0.011      | -0.021           | 0.04                | 0.032          | 0.063          | 0.033               | 0.012                  |
| CASE1105    | UPD           | NA      | YES  |      | 7   | 62,401,114  | 96,812,073  | 34.4      | -0.049      | -0.019      | -0.021           | 0.039               | 0.03           | 0.148          | 0.036               | 0.013                  |
|             |               |         |      |      |     | 96,934,617  | 158,821,424 | 61.8      | -0.049      | -0.047      | -0.021           | 0.039               | 0.03           | 0.086          | 0.036               | 0.013                  |
| CONTROL468  | UPD           | NA      | YES  |      | 7   | 69,769,236  | 158,821,424 | 89        | -0.067      | -0.06       | -0.021           | 0.039               | 0.044          | 0.303          | 0.036               | 0.013                  |
| CONTROL586  | UPD           | NA      | YES  |      | 9   | 1           | 39,102,964  | 39.1      | -0.025      | -0.019      | -0.02            | 0.039               | 0.03           | 0.347          | 0.034               | 0.013                  |
| CONTROL843  | UPD           | NA      | YES  |      | 11  | 65,547,103  | 134,452,384 | 68.9      | -0.045      | -0.037      | -0.021           | 0.037               | 0.036          | 0.099          | 0.034               | 0.012                  |
| CASE125     | UPD           | NA      | YES  |      | 12  | 55,481,646  | 132,349,534 | 76.8      | -0.046      | -0.045      | -0.02            | 0.038               | 0.027          | 0.06           | 0.034               | 0.012                  |
| CASE234     | UPD           | NA      | YES  |      | 13  | 17,956,717  | 114,142,980 | 96.1      | 0.012       | 0.019       | -0.023           | 0.043               | 0.029          | 0.053          | 0.033               | 0.013                  |
| CASE962     | UPD           | YES     | NA   |      | 13  | 19,554,439  | 114,142,980 | 94.5      | 0.021       | 0.034       | -0.023           | 0.043               | 0.035          | 0.136          | 0.033               | 0.013                  |
| CASE787     | UPD           | NI      | YES  |      | 14  | 23,303,146  | 106,368,585 | 83        | -0.052      | -0.051      | -0.021           | 0.038               | 0.032          | 0.164          | 0.033               | 0.013                  |
| CASE758     | UPD           | YES     | YES  |      | 14  | 74,454,224  | 106,368,585 | 31.9      | -0.005      | -0.016      | -0.021           | 0.038               | 0.01           | 0.081          | 0.033               | 0.013                  |
| CASE1205    | UPD           | YES     | YES  |      | 16  | 1           | 14,565,117  | 14.5      | -0.032      | -0.076      | -0.019           | 0.04                | 0.037          | 0.065          | 0.036               | 0.012                  |
| CASE962     | UPD           | YES     | NA   |      | 17  | 1           | 18,649,825  | 18.6      | -0.079      | -0.036      | -0.018           | 0.04                | 0.03           | 0.202          | 0.037               | 0.013                  |
| CASE815     | UPD           | YES     | YES  | YES  | 17  | 1           | 4,724,664   | 4.7       | 0.021       | -0.003      | -0.018           | 0.04                | 0.035          | 0.134          | 0.037               | 0.013                  |
| CASE369     | UPD           | NI      | YES  |      | 17  | 37,339,650  | 78,774,742  | 41.4      | 0.017       | 0.019       | -0.018           | 0.04                | 0.027          | 0.116          | 0.037               | 0.013                  |
| CONTROL1007 | UPD           | YES     | YES  |      | 17  | 53,007,738  | 78,774,742  | 25.7      | -0.066      | -0.074      | -0.018           | 0.04                | 0.032          | 0.098          | 0.037               | 0.013                  |
| CONTROL670  | UPD           | NA      | YES  |      | 19  | 48,312,997  | 63,811,651  | 15.4      | 0.017       | 0.018       | -0.022           | 0.051               | 0.026          | 0.09           | 0.043               | 0.014                  |
| CASE138     | UPD           | NA      | YES  |      | 21  | 31,600,986  | 46,944,323  | 15.3      | 0.006       | 0.028       | -0.022           | 0.039               | 0.029          | 0.09           | 0.034               | 0.012                  |

**Table S2B. Mosaic copy number change** rearrangements affecting autosomes, showing slightly abnormal LogR values under the CNV call cut-off along with abnormal heterozygous B-deviation parameters when compared to the genome-wide hybridization data of the sample and to the whole dataset.

<sup>a</sup>Region of complete homozygosity, compatible with non-mosaic UPD or identity by descent (IBD), overlapping with the interstitial mosaic deletion below.

UPD: Uniparental Disomy, NA: Not Analysed; NI: Not Informative (homozygous marker).

| sampleID    | rearrangement        | Micros. | MLPA | FISH <sup>b</sup> | chr | start       | end         | Size (Mb) | LogR sample | LogR mosaic | LogR chr_dataset | LogR_SD chr_dataset | HetBdev sample | HetBdev mosaic | HetBdev chr_dataset | HetBdev_SD chr_dataset |
|-------------|----------------------|---------|------|-------------------|-----|-------------|-------------|-----------|-------------|-------------|------------------|---------------------|----------------|----------------|---------------------|------------------------|
| CONTROL468  | duplication          | NA      | YES  |                   | 1   | 31,508,099  | 58,012,249  | 26.3      | -0.067      | 0.105       | -0.019           | 0.037               | 0.044          | 0.119          | 0.034               | 0.012                  |
| CASE197     | deletion             | NA      | YES  |                   | 5   | 107,759,583 | 131,76,9397 | 24        | -0.009      | -0.076      | -0.022           | 0.040               | 0.032          | 0.089          | 0.033               | 0.012                  |
| CONTROL771  | deletion             | NA      | YES  |                   | 9   | 70,096,379  | 107,838,079 | 37.7      | 0.009       | -0.135      | -0.020           | 0.039               | 0.029          | 0.119          | 0.034               | 0.013                  |
| CASE1044    | deletion             | NA      | YES  |                   | 9   | 82,074,397  | 104,355,425 | 22.2      | -0.008      | -0.489      | -0.020           | 0.039               | 0.029          | 0.352          | 0.034               | 0.013                  |
| CONTROL1014 | deletion             | YES     | NA   |                   | 11  | 93,126,656  | 116,093,059 | 22.9      | 0.004       | -0.097      | -0.021           | 0.037               | 0.04           | 0.072          | 0.034               | 0.012                  |
| CONTROL1017 | deletion             | NA      | YES  |                   | 16  | 1           | 3,888,919   | 3.8       | 0.007       | -0.087      | -0.019           | 0.040               | 0.035          | 0.315          | 0.036               | 0.012                  |
| CASE1079    | deletion             | NA      | YES  |                   | 20  | 30,488,149  | 31,745,200  | 1.2       | -0.004      | -0.26       | -0.018           | 0.039               | 0.03           | 0.227          | 0.033               | 0.012                  |
| CASE571     | deletion             | YES     | YES  |                   | 20  | 30,491,175  | 48,812,965  | 18.3      | 0.01        | -0.163      | -0.018           | 0.039               | 0.034          | 0.173          | 0.033               | 0.012                  |
| CONTROL837  | deletion             | YES     | YES  |                   | 20  | 30,824,044  | 48,140,963  | 17.3      | 0.005       | -0.120      | -0.018           | 0.039               | 0.04           | 0.116          | 0.033               | 0.012                  |
| CASE426     | deletion             | YES     | YES  | YES               | 20  | 33,993,320  | 53,443,077  | 19.4      | -0.01       | -0.483      | -0.018           | 0.039               | 0.04           | 0.351          | 0.033               | 0.012                  |
| CONTROL191  | UPD/IBD <sup>a</sup> | YES     | YES  |                   | 20  | 22,351,287  | 44,783,987  | 22.4      | -0.017      | -0.015      | -0.018           | 0.039               | 0.047          | -              | 0.033               | 0.012                  |
|             | deletion             | YES     | YES  |                   | 20  | 30,488,149  | 48,812,965  | 18.3      | -0.017      | -0.205      | -0.018           | 0.039               | 0.047          | 0.167          | 0.033               | 0.012                  |
| CONTROL577  | trisomy              | YES     | YES  |                   | 8   | 1           | 146,274,826 | 146.3     | 0.013       | 0.127       | -0.021           | 0.039               | 0.037          | 0.083          | 0.033               | 0.012                  |
| CASE1185    | trisomy              | YES     | YES  | YES               | 9   | 1           | 140,273,252 | 140.3     | -0.013      | 0.159       | -0.020           | 0.039               | 0.041          | 0.189          | 0.034               | 0.013                  |
| CASE426     | trisomy              | YES     | YES  | YES               | 9   | 1           | 140,273,252 | 140.3     | -0.01       | 0.269       | -0.020           | 0.039               | 0.04           | 0.154          | 0.034               | 0.013                  |
| CONTROL152  | trisomy              | NI      | YES  |                   | 9   | 1           | 140,273,252 | 140.3     | -0.04       | 0.105       | -0.020           | 0.039               | 0.038          | 0.094          | 0.034               | 0.013                  |
| CONTROL1014 | trisomy              | YES     | YES  |                   | 12  | 1           | 132,349,534 | 132.3     | 0.004       | 0.129       | -0.020           | 0.038               | 0.04           | 0.084          | 0.034               | 0.012                  |
| CASE511     | trisomy              | NA      | YES  |                   | 15  | 1           | 100,338,915 | 100.3     | -0.042      | 0.053       | -0.018           | 0.037               | 0.03           | 0.064          | 0.035               | 0.012                  |
| CONTROL541  | trisomy              | YES     | YES  |                   | 19  | 1           | 63,811,651  | 63.8      | -0.026      | 0.222       | -0.022           | 0.051               | 0.035          | 0.162          | 0.043               | 0.014                  |
| CASE1185    | trisomy              | YES     | YES  |                   | 22  | 1           | 49,691,432  | 49.7      | -0.013      | 0.136       | -0.020           | 0.047               | 0.041          | 0.109          | 0.037               | 0.013                  |



**Table S3. Statistical tests for case-control comparisons of mosaic rearrangement frequency and proportion of cells carrying the rearrangement**

| <b>Fisher's test for count data</b> |                     |               |                     |                |                     |               |                    |                 |
|-------------------------------------|---------------------|---------------|---------------------|----------------|---------------------|---------------|--------------------|-----------------|
|                                     | <b>Deletion</b>     | <b>no CNV</b> | <b>Trisomy+Dup</b>  | <b>no TRIS</b> | <b>UPD</b>          | <b>no UPD</b> | <b>Any event</b>   | <b>no event</b> |
| <b>CASES</b>                        | 5                   | 1029          | 3                   | 1031           | 12                  | 1022          | 19                 | 1015            |
| <b>CONTROLS</b>                     | 5                   | 952           | 5                   | 952            | 7                   | 950           | 15                 | 942             |
| <b>OR</b>                           | 0.925 (0.212-4.033) |               | 0.554 (0.085-2.857) |                | 1.593 (0.624-4.064) |               | 1.175(0.593-2.326) |                 |
| <b>p-values</b>                     | 1.000               |               | 0.492               |                | 0.450               |               | 0.764              |                 |

| <b>Welch two sample t-test for differences in the proportion of cells carrying each type of mosaic rearrangement</b> |          |           |          |
|----------------------------------------------------------------------------------------------------------------------|----------|-----------|----------|
|                                                                                                                      | <b>t</b> | <b>df</b> | <b>p</b> |
| <b>Deletions</b>                                                                                                     | 1.561    | 5.448     | 0.174    |
| <b>Trisomies+Duplications</b>                                                                                        | 0.219    | 6.470     | 0.833    |
| <b>UPDs</b>                                                                                                          | -2.028   | 7.892     | 0.077    |

**Table S4. Genomic location and sequence characteristics of the breakpoint (BP) intervals for each somatic rearrangement**

| Rearrangement         | Chr | BP location range              | Genomic feature                               | Gene or genomic sequence                                        |
|-----------------------|-----|--------------------------------|-----------------------------------------------|-----------------------------------------------------------------|
| duplication           | 1p  | 31505375-31508099              | CNV                                           | Within the <i>SNRNP40</i> gene                                  |
|                       |     | 58012249-58020360              | MRH                                           | Within the <i>DAB1</i> gene                                     |
| deletion              | 5q  | 107751916-107759583            | -                                             | Gene desert region (>100kb)                                     |
|                       |     | 131769397-131780519            | -                                             | Within the <i>C5orf56</i> gene                                  |
| deletion              | 9q  | 70093133-70096379              | SD, CNV                                       | Within the <i>CBWB3</i> gene, SD close to the centromere        |
|                       |     | 107838079-107840864            | -                                             | Gene desert region (>500kb)                                     |
| deletion              | 9q  | 82074032-82074397              | -                                             | Gene desert region (>1500kb)                                    |
|                       |     | 104355425-104357470            | -                                             | Gene desert region (>1000kb)                                    |
| deletion              | 11q | 93121041-93126656              | -                                             | Within the <i>C11orf54</i> gene                                 |
|                       |     | 116093059-116094337            | -                                             | Gene desert region (>1000kb)                                    |
| deletion              | 16p | 3888919-3902621                | MRH <sup>d</sup>                              | Intergenic, between <i>CREBBP</i> & <i>ADCY9</i> genes          |
| deletion              | 20q | 30486620-30488149              | -                                             | Within the <i>ASXL1</i> gene                                    |
|                       |     | 31745200-31748231              | -                                             | Intergenic, between <i>E2F1</i> & <i>PXMP4</i> genes            |
| deletion <sup>a</sup> | 20q | 30489196-30491175              | -                                             | Within the <i>ASXL1</i> gene                                    |
|                       |     | 48812965-48815555              | MRH <sup>d</sup> , SD <sup>d</sup> ,<br>(CNV) | Intergenic, between <i>PARD6B</i> & <i>BCAS4</i> genes          |
| deletion              | 20q | 30823358-30824044              | (CNV)                                         | Within the <i>DNMT3B</i> gene                                   |
|                       |     | 48140963-48144977              | (CNV)                                         | Within the <i>UBE2V1</i> gene                                   |
| deletion              | 20q | 33985474-33993320              | (CNV)                                         | Within the <i>PHF20</i> gene                                    |
|                       |     | 53443077-53451892              | -                                             | Gene desert region (>1000kb)                                    |
| UPD                   | 1p  | 31505375-31508099              | CNV                                           | Within the <i>SNRNP40</i> gene                                  |
| UPD                   | 2p  | 5974108-5987460                | MRH <sup>d</sup>                              | Intergenic, between the <i>SOX11</i> and <i>LOC150622</i> genes |
| UPD                   | 2q  | 210669755-210673136            | -                                             | Within the <i>C2orf67</i> gene                                  |
| UPD                   | 2q  | 218461881-218476667            | -                                             | Within the <i>TNS1</i> gene                                     |
| UPD                   | 3p  | 43770009-43771496              | MRH                                           | Intergenic, between the <i>ABHD5</i> and <i>C3orf77</i> genes   |
| UPD                   | 7q  | 62326882-62401114              | SD, CNV                                       | In a large SD cluster close to cen                              |
|                       |     | 96812073-96821617              | MRH                                           | Gene desert region (>500kb)                                     |
| UPD                   | 7q  | 69763300-69769236              | MRH <sup>d</sup>                              | Within the <i>AUTS2</i> gene                                    |
| UPD <sup>b</sup>      | 9p  | 39102964-39139209              | SD, CNV                                       | Region rich in SD up to the centromere                          |
| UPD                   | 11q | 65433092-65547103 <sup>c</sup> | MRH <sup>d</sup> , CNV <sup>d</sup>           | Interval containing 7 genes, <i>C11orf68</i> to <i>CATSPER1</i> |
| UPD                   | 12q | 55476810-55481646              | -                                             | Intergenic, between <i>HSD17B6</i> & <i>SDR9C7</i> genes        |
| UPD                   | 13q | 17922259-17956717              | SD, CNV                                       | Region rich in SD up to the centromere                          |
| UPD                   | 13q | 19515797-19554439              | -                                             | Within the <i>ZMYM2</i> gene                                    |
| UPD                   | 14q | 23294523-23303146              | MRH <sup>d</sup>                              | Intergenic, between <i>DHRS2</i> & <i>C14orf165</i> genes       |
| UPD                   | 14q | 74448100-74454224              | -                                             | Within the <i>RPS6KL1</i> gene                                  |
| UPD                   | 16p | 14565117-14572980              | (CNV)                                         | Within the <i>PARN1</i> gene                                    |
| UPD                   | 17p | 18649825-18659852              | SD, CNV                                       | Within the <i>LLG1</i> gene                                     |
| UPD                   | 17p | 4724664-4736083                | CNV                                           | Within the <i>MINK1</i> gene                                    |
| UPD                   | 17q | 37211915-37339650 <sup>c</sup> | -                                             | Interval containing 6 genes, <i>SC65</i> to <i>ACLY</i>         |
| UPD                   | 17q | 52969779-53007738              | (CNV)                                         | Within the <i>MSI2</i> gene                                     |
| UPD                   | 19q | 48275526-48312997              | SD, CNV                                       | Cluster of <i>PSG</i> gene copies in SD                         |
| UPD                   | 21q | 31595718-31600986              | SD                                            | Within the <i>TIAM1</i> gene                                    |

Meiotic recombination hotspots (MRH), averaged across populations, were obtained from the HapMap website. The width of a hotspot represents the region where the estimated rate is within a factor of two of the maximum (Myers *et al*, Science 2010). We defined a rearrangement breakpoint interval as coincidental with a specific genomic feature or sequence (SD, MRH, CNV, gene) when more than 50% of the feature overlapped with the breakpoint interval between.

**MRH**: meiotic recombination hotspot. **SD**: segmental duplication. **CNV**: copy number variation

<sup>a</sup>Almost identical 20q deletion detected in two samples (case571 and control191)

<sup>b</sup>Almost identical 9p UPD detected in two samples

<sup>c</sup>A relatively poor definition of the breakpoint interval (>100kb) in two UPD samples was due to the presence of stretches of homozygosity (uninformative SNPs) in the region.

<sup>d</sup>The feature encompasses less than 50% of the defined breakpoint interval. CNVs only reported with BAC arrays, whose boundaries are probably not well defined, are shown between brackets.

**Table S5. Coordinates of MLPA and and microsatellite PCR products (hg18 assembly)**

| <b>Name</b> | <b>Chr</b> | <b>start_product</b> | <b>end_product</b> |
|-------------|------------|----------------------|--------------------|
| <b>FISH</b> |            |                      |                    |
| CTD-2009B12 | 17         | 371,341              | 489,193            |
| CTD-2556K12 | 17         | 551,111              | 747,647            |
| RP11-216P6  | 17         | 814,501              | 916,339            |
| RP11-85C21  | 9          | 126,320,900          | 126,493,771        |
| RP11-634C23 | 9          | 126,511,066          | 126,654,826        |
| RP11-346B17 | 9          | 126,774,264          | 126,941,040        |
| RP11-116O13 | 20         | 43,536,601           | 43,730,870         |
| RP11-103O9  | 20         | 43,833,556           | 44,008,890         |
| RP11-702N24 | 22         | 17,298,032           | 17,448,439         |
| RP11-800B2  | 22         | 17,466,004           | 17,647,712         |
| RP11-479G10 | 22         | 17,630,839           | 17,818,820         |
| <b>MLPA</b> |            |                      |                    |
| HDAC1 exon6 | 1          | 32,565,785           | 32,565,866         |
| CDCA8       | 1          | 37,943,701           | 37,943,757         |
| PRR16       | 5          | 119,828,162          | 119,828,215        |
| SEMA6A      | 5          | 115,846,143          | 115,846,142        |
| AUTS2       | 7          | 69,884,540           | 69,884,599         |
| WBSCR17     | 7          | 70,235,725           | 70,235,777         |
| FKBP6       | 7          | 72,392,746           | 72,392,793         |
| BAZ1B       | 7          | 72,563,035           | 72,563,100         |
| WBSCR14     | 7          | 72,668,338           | 72,668,383         |
| WBSCR22     | 7          | 72,745,566           | 72,745,619         |
| STX1A       | 7          | 72,761,324           | 72,761,380         |
| LIMK1       | 7          | 73,136,250           | 73,136,311         |
| WBSCR1      | 7          | 73,242,518           | 73,242,565         |
| RCF2        | 7          | 73,295,450           | 73,295,488         |
| CYLN2       | 7          | 73,412,489           | 73,412,533         |
| GTF2IRD1    | 7          | 73,560,406           | 73,560,449         |
| GTF2I       | 7          | 73,769,150           | 73,769,203         |
| WBSCR16     | 7          | 74,124,453           | 74,124,512         |
| HIP1        | 7          | 75,059,659           | 75,059,715         |
| TRIM56      | 7          | 100,519,362          | 100,519,417        |
| EMID2       | 7          | 100,849,979          | 100,850,030        |
| CUTL1       | 7          | 101,679,399          | 101,679,455        |
| PRKRIP1     | 7          | 101,827,026          | 101,827,097        |
| SCNN1G      | 16         | 23,108,201           | 23,108,259         |
| MAPT        | 17         | 41,458,365           | 41,458,434         |
| SPAG4L      | 20         | 31,037,243           | 31,037,299         |
| SNTA1       | 20         | 31,489,063           | 31,489,119         |
| PPGB        | 20         | 43,954,792           | 43,954,845         |
| PLTPb       | 20         | 43,961,027           | 43,961,085         |
| PLTP        | 20         | 43,968,347           | 43,968,404         |
| HIRA        | 22         | 17,693,525           | 17,693,575         |
| RP11-652F11 | 22         | 18,029,000           | 18,029,066         |
| COMT        | 22         | 18,330,070           | 18,330,129         |
| ZDHHC8      | 22         | 18,508,156           | 18,508,215         |
| RP11-307O16 | 22         | 20,832,866           | 20,832,924         |
| RP11-757F24 | 22         | 21,151,921           | 21,151,975         |
| RP11-281O23 | 22         | 21,286,912           | 21,286,964         |
| RP11-50L23  | 22         | 21,434,354           | 21,434,413         |
| RP11-264C20 | 22         | 21,521,303           | 21,521,350         |

|             |    |            |            |
|-------------|----|------------|------------|
| RP11-165G05 | 22 | 21,650,048 | 21,650,112 |
| GNB1L       | 22 | 18,169,603 | 18,169,662 |
| SHANK3      | 22 | 49,461,919 | 49,461,975 |

---

**MRC-Holland MLPA**

---

P036B: All subtelomeric regions and pseudoautosomal regions

P070: All subtelomeric regions and pseudoautosomal regions

---

**Microsatellite Markers**

---

|          |    |             |             |
|----------|----|-------------|-------------|
| D1S2667  | 1  | 11,409,625  | 11,409,894  |
| D1S199   | 1  | 19,829,636  | 19,829,735  |
| D2S396   | 2  | 230,391,872 | 230,392,111 |
| D2S338   | 2  | 236,900,151 | 236,900,439 |
| D5S471   | 5  | 118,976,843 | 119,177,177 |
| D8S264   | 8  | 2,117,740   | 2,117,874   |
| D8S505   | 8  | 34,570,543  | 34,570,687  |
| D8S514   | 8  | 123,811,415 | 123,811,633 |
| D8S272   | 8  | 137,804,548 | 137,804,711 |
| D9S288   | 9  | 3,941,792   | 3,941,919   |
| D9S286   | 9  | 8,043,436   | 8,043,574   |
| D9S1776  | 9  | 116,999,255 | 116,999,373 |
| D9S164   | 9  | 135,245,780 | 135,245,933 |
| D11S898  | 11 | 100,561,808 | 100,561,956 |
| D11S908  | 11 | 114,792,573 | 114,792,698 |
| D12S336  | 12 | 9,385,421   | 9,385,618   |
| D12S364  | 12 | 13,724,592  | 13,724,744  |
| D12S79   | 12 | 114,544,838 | 114,545,000 |
| D12S86   | 12 | 117,654,705 | 117,654,838 |
| D13S263  | 13 | 40,978,976  | 40,979,126  |
| D13S170  | 13 | 80,007,129  | 80,007,346  |
| D13S158  | 13 | 102,774,399 | 102,774,509 |
| D13S285  | 13 | 111,843,433 | 111,843,541 |
| D14S283  | 14 | 21,757,385  | 21,757,515  |
| D14S258  | 14 | 69,652,764  | 69,652,939  |
| D14S68   | 14 | 87,697,518  | 87,697,683  |
| D14S292  | 14 | 103,566,457 | 103,766,715 |
| D14S985  | 14 | 100,266,289 | 100,466,568 |
| D16S423  | 16 | 5,883,142   | 6,083,470   |
| D17S849  | 17 | 346,160     | 346,416     |
| D17S831  | 17 | 1,806,767   | 1,806,994   |
| D17S1828 | 17 | 3,700,488   | 3,700,696   |
| D17S921  | 17 | 14,201,467  | 14,201,613  |
| D17S787  | 17 | 50,637,083  | 50,637,234  |
| D17S785  | 17 | 71,942,972  | 71,943,161  |
| D17S784  | 17 | 75,316,716  | 75,517,019  |
| D19S884  | 19 | 8,056,011   | 8,056,236   |
| D19S221  | 19 | 12,573,793  | 12,573,991  |
| D19S902  | 19 | 53,023,869  | 53,024,083  |
| D19S571  | 19 | 57,988,784  | 57,989,011  |
| D20S107  | 20 | 38,315,955  | 38,316,159  |
| D20S119  | 20 | 43,082,466  | 43,082,583  |
| D20S178  | 20 | 45,985,389  | 45,985,642  |
| D20S196  | 20 | 48,995,183  | 48,995,325  |
| D22S420  | 22 | 16,239,503  | 16,239,639  |
| D22S315  | 22 | 24,345,881  | 24,346,065  |
| D22S280  | 22 | 31,539,423  | 31,539,626  |
| D22S283  | 22 | 35,080,895  | 35,081,028  |

---
